# Supplementary material for: Classification of Complete Proteomes of Different Organisms and Protein Sets Based on Their Protein Distributions in Terms of Some Key Attributes of Proteins
Source: Hindawi journal article supplement (doi:10.1155/2018/9784161), 2018-01-01
Supplement: f1 [file 9784161.f1.pdf]

## Classification of Complete Proteomes of Different Organisms and Protein Sets Based on Their Protein Distributions in Terms of Some Key Attributes of Proteins

Hao-Bo Guo<sup>1</sup>, Yue Ma<sup>1</sup>, Gerald A. Tuskan<sup>2</sup>, Xiaohan Yang<sup>1,2,\*</sup>, Hong Guo<sup>1,\*</sup>

<sup>1</sup>Department of Biochemistry and Cellular and Molecular Biology, University of Tennessee, Knoxville, TN 37996

<sup>2</sup>Biosciences Division, Oak Ridge National Laboratory, Oak Ridge, TN 37831

\*Corresponding authors: HG (hguo1@utk.edu) or XY (yangx@ornl.gov)

The supplementary information include:

**Table S1.** Correlation coefficients between  $\ln(L)$  and ID%

**Table S2.** Intervals that partition the  $L$ - $D$  spaces into  $M \times N$  blocks with  $M=N=2$  and 5

**Table S3.** IDPs in the mitochondrion and chloroplast of *A. thaliana*

**Figure S1.** Protein-density contour maps

**Figure S2.** Phylogenetic trees reconstructed from the protein distributions in the  $L$ - $D$  space using (A).  $M=N=2$  and (B).  $M=N=5$ . Eukaryotes are in red, prokaryotes (bacteria and Archaea) in blue and viruses in pink branches, respectively. MEGA5 (1) was used to plot the trees. Compared to the  $M=N=10$  (Fig. 4), the branch length of the tree is larger than the  $M=N=10$  tree.

**Figure S3.** Phylogenetic tree reconstructed from gene densities on the  $LD$  space. Different versions (v01-v03) of the *P. trichocarpa* proteomes have been used. By default of the present work only proteins from primary transcripts are chosen for all proteomes. Here for *P. trichocarpa* proteome v03, we tested both the primary transcripts (41,434 proteins) and all transcripts (73,013 proteins). We show here that progressive improvements and including of the splicing variants did not make significant changes in the phylogeny.

36 **Table S1.** Correlation coefficients between  $\ln(L)$  and ID.

| Species <sup>a</sup>        | Pearson  | Spearman |
|-----------------------------|----------|----------|
| <i>C. reinhardtii</i>       | 0.225    | 0.262    |
| <i>D. melanogaster</i>      | 0.073    | 0.09     |
| <i>Monocercomonoides</i>    | 0.052    | 0.047    |
| <i>H. sapiens</i>           | 0.021    | 0.062    |
| <i>S. cerevisiae</i>        | -0.034   | 0.009    |
| <i>P. patens</i>            | -0.076   | -0.049   |
| <i>P. trichocarpa</i>       | -0.084   | -0.072   |
| <i>Mimivirus</i>            | -0.125   | -0.155   |
| <i>A. thaliana</i>          | -0.154   | -0.138   |
| <i>G. intestinalis</i>      | -0.176   | -0.146   |
| Viruses (gene set)          | -0.189   | -0.17    |
| <i>A. comosus</i>           | -0.201   | -0.187   |
| <i>A. trichopoda</i>        | -0.222   | -0.209   |
| <i>Rickettsiales</i>        | -0.224   | -0.208   |
| <i>Pandoravirus</i>         | -0.244   | -0.221   |
| Plasmids (gene set)         | -0.25    | -0.212   |
| <i>S. elongatus</i>         | -0.268   | -0.23    |
| <i>I. hospitalis</i>        | -0.317   | -0.254   |
| <i>O. sativa</i>            | -0.328   | -0.309   |
| <i>N. equitans</i>          | -0.348   | -0.251   |
| Plastids (gene set)         | -0.357   | -0.439   |
| <i>E. coli</i>              | -0.358   | -0.287   |
| <i>Lockiarchaeum</i>        | -0.375   | -0.322   |
| Mitochondria (gene set)     | -0.507   | -0.468   |
| All proteins <sup>b</sup>   | -0.101   | -0.129   |
| <i>p-value</i> <sup>c</sup> | <2.2e-16 | <2.2e-16 |

37 a. Ranked by the Pearson's CC. Also see Table 1 in main text;

38 b. All 811,600 protein entries studied in this work

39 c. P-values estimated using the program R

40

**Table S2.** Intervals that partition the  $L$ - $D$  spaces into  $M \times N$  blocks with  $M=N=2$  and 5

| 2×2 | #     | 1       |           | 2         |           |           |
|-----|-------|---------|-----------|-----------|-----------|-----------|
|     | ln(L) | [0,5.8) |           | [5.8, ∞)  |           |           |
|     | L     | [1,331) |           | [331, ∞)  |           |           |
|     | ID%   | [0,0.5) |           | [0.5,1.0] |           |           |
| 5×5 | #     | 1       | 2         | 3         | 4         | 5         |
|     | ln(L) | [0,4.9) | [4.9,5.5) | [5.5,6.1) | [6.1,6.7) | [6.7, ∞)  |
|     | L     | [1,135) | [135,245) | [245,446) | [446,813) | [813, ∞)  |
|     | ID%   | [0,0.2) | [0.2,0.4) | [0.4,0.6) | [0.6,0.8) | [0.8,1.0) |

45 **Table S3.** IDPs in the mitochondrion and chloroplast of *A. thaliana*

| Organelle     | Gene      | Length (aa) | ID%  | Annotation <sup>a</sup>                           |
|---------------|-----------|-------------|------|---------------------------------------------------|
| Mitochondrion | ATMG00890 | 106         | 100  | Cytochrome C assembly protein (ORF106D)           |
|               | ATMG00200 | 107         | 100  | Unknown                                           |
|               | ATMG00660 | 149         | 100  | Unknown                                           |
|               | ATMG00980 | 125         | 96.8 | Ribosomal protein L2 (RPSL2)                      |
|               | ATMG01290 | 111         | 95.5 | Unknown                                           |
|               | ATMG00880 | 187         | 75.9 | Unknown                                           |
|               | ATMG01330 | 127         | 74.8 | Unknown                                           |
|               | ATMG01130 | 106         | 72.6 | Unknown                                           |
|               | ATMG01030 | 106         | 71.7 | Unknown                                           |
|               | ATMG00130 | 121         | 68.6 | Unknown                                           |
|               | ATMG01040 | 107         | 68.2 | Unknown                                           |
|               | ATMG00010 | 153         | 68.0 | Unknown                                           |
|               | ATMG00870 | 184         | 66.8 | Unknown                                           |
|               | ATMG00670 | 275         | 60.7 | Unknown                                           |
|               | ATMG00540 | 122         | 59.0 | Unknown                                           |
|               | ATMG00560 | 349         | 55.6 | Ribosomal protein L2 (RPL2)                       |
|               | ATMG01010 | 118         | 52.5 | Unknown                                           |
|               | ATMG00690 | 240         | 52.5 | Unknown                                           |
|               | ATMG01100 | 105         | 52.4 | Unknown                                           |
|               | ATMG01400 | 105         | 52.4 | Unknown                                           |
|               | ATMG00140 | 167         | 52.1 | Unknown                                           |
|               | ATMG00910 | 215         | 52.1 | Unknown                                           |
|               | ATMG01200 | 294         | 50.0 | ATPase F1 complex, alpha subunit protein (ORF294) |
| Chloroplast   | ATCG00760 | 37          | 100  | Ribosomal protein L36 (RPL36)                     |
|               | ATCG01020 | 52          | 100  | Ribosomal protein L32 (RPL32)                     |
|               | ATCG00330 | 100         | 74.0 | Ribosomal protein S14 (RPS14)                     |
|               | ATCG00650 | 101         | 70.3 | Ribosomal protein S18 (RPS18)                     |
|               | ATCG01120 | 88          | 69.3 | Ribosomal protein S15 (RPS15)                     |
|               | ATCG00660 | 117         | 50.4 | Ribosomal protein L20 (RPL20)                     |

46 a. Annotations obtained from The Arabidopsis Information Resource (TAIR).

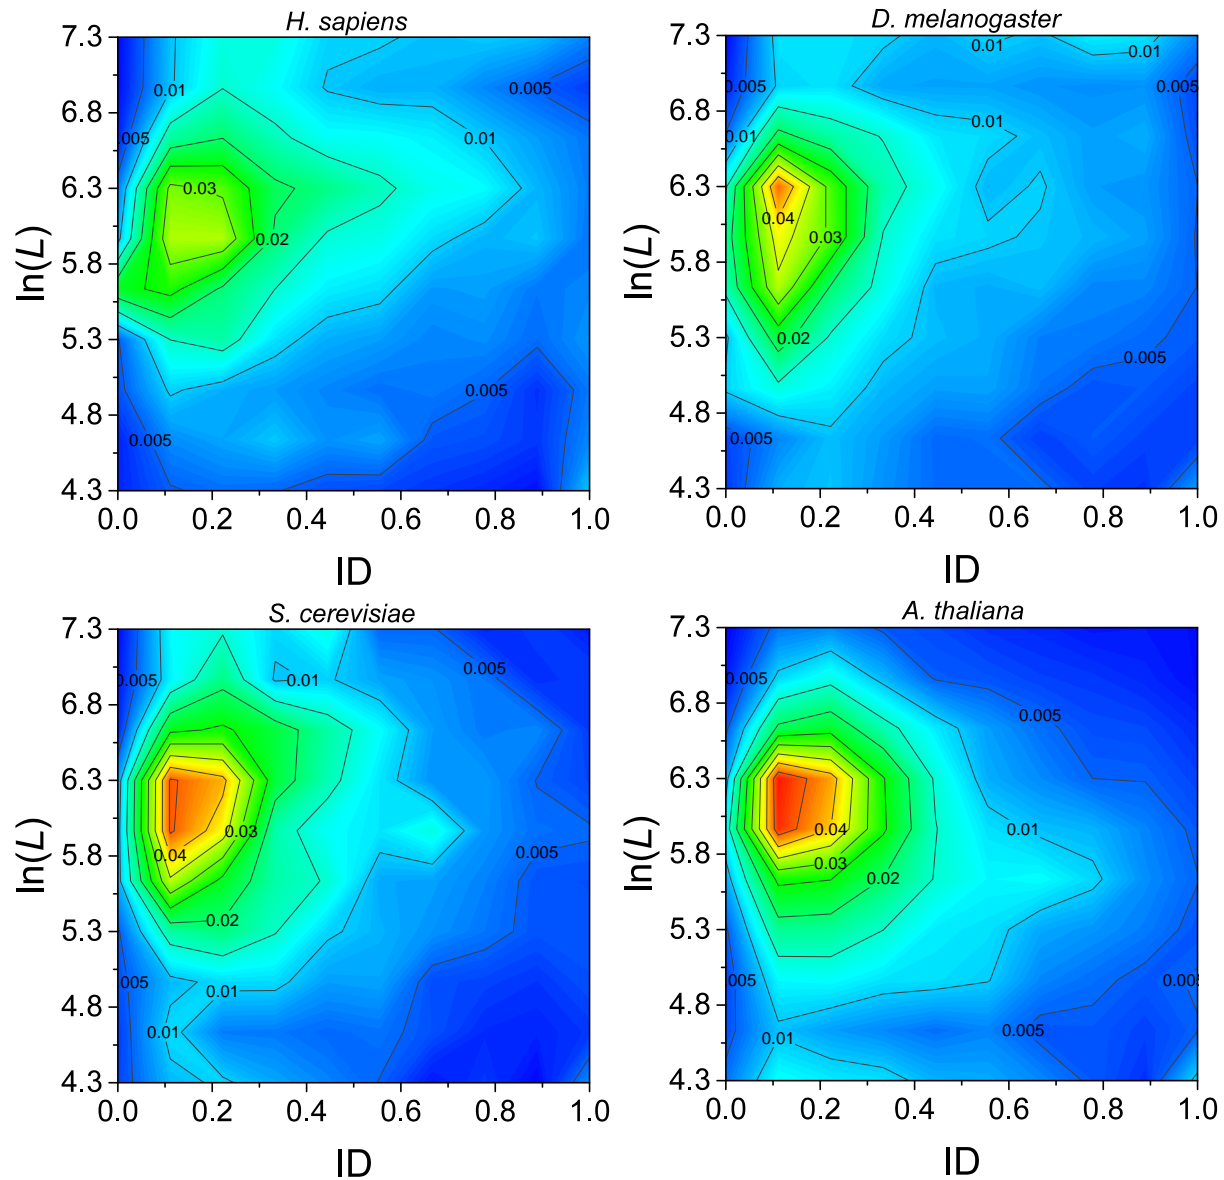

**Figure S1.** Protein-density contour maps (See Figure 3A in main text for the scale bar).

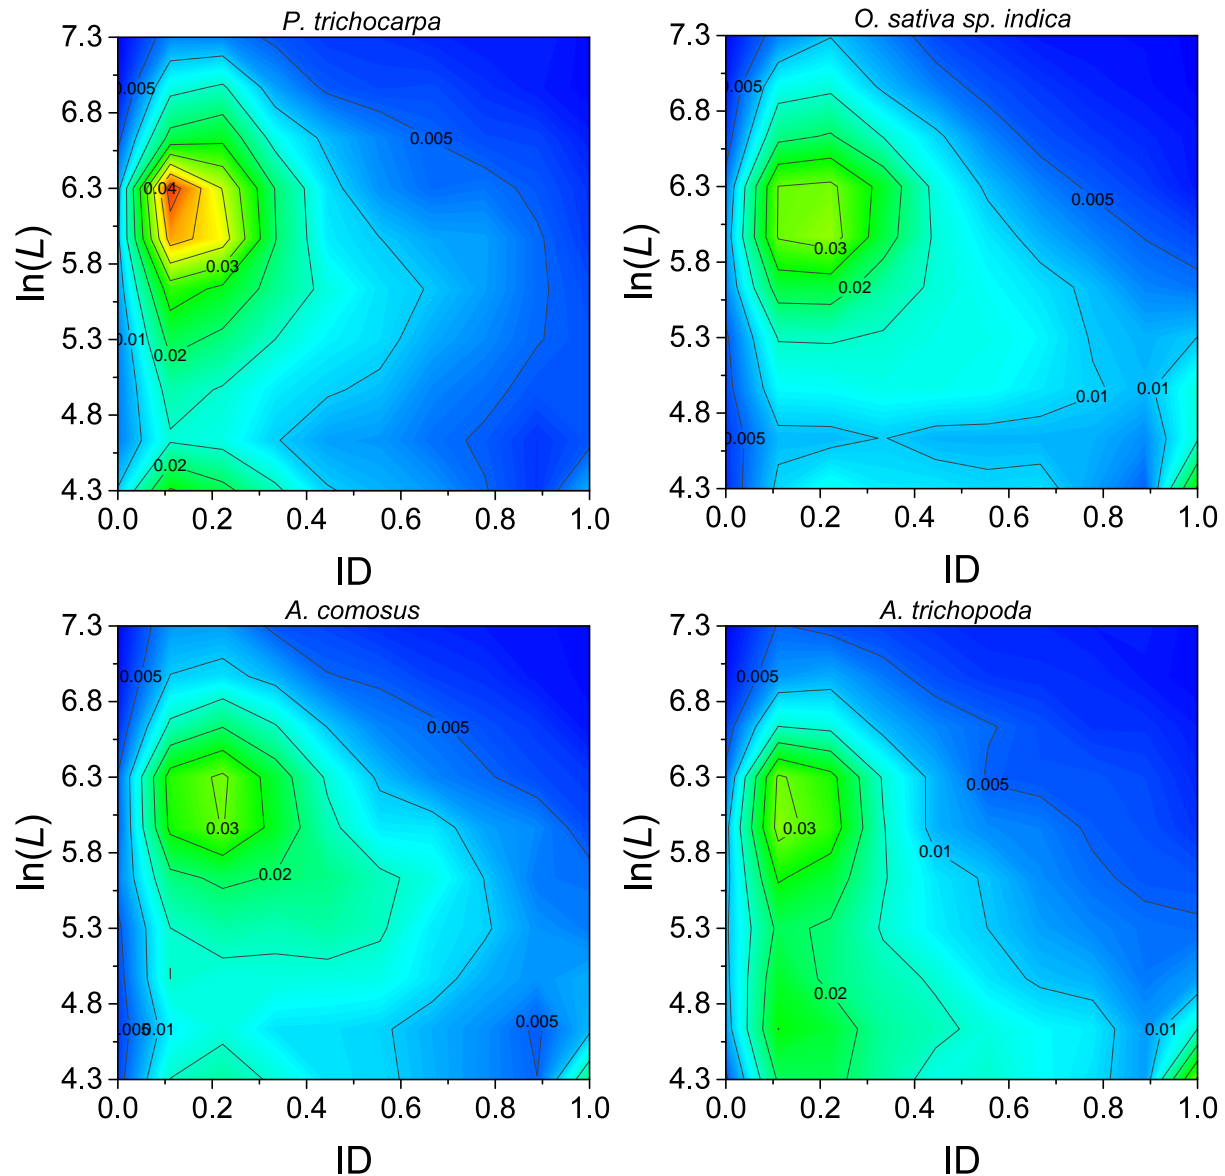

**Figure S1** (continued). Protein-density contour maps, continued (See Figure 3 in main text for the scale bar).

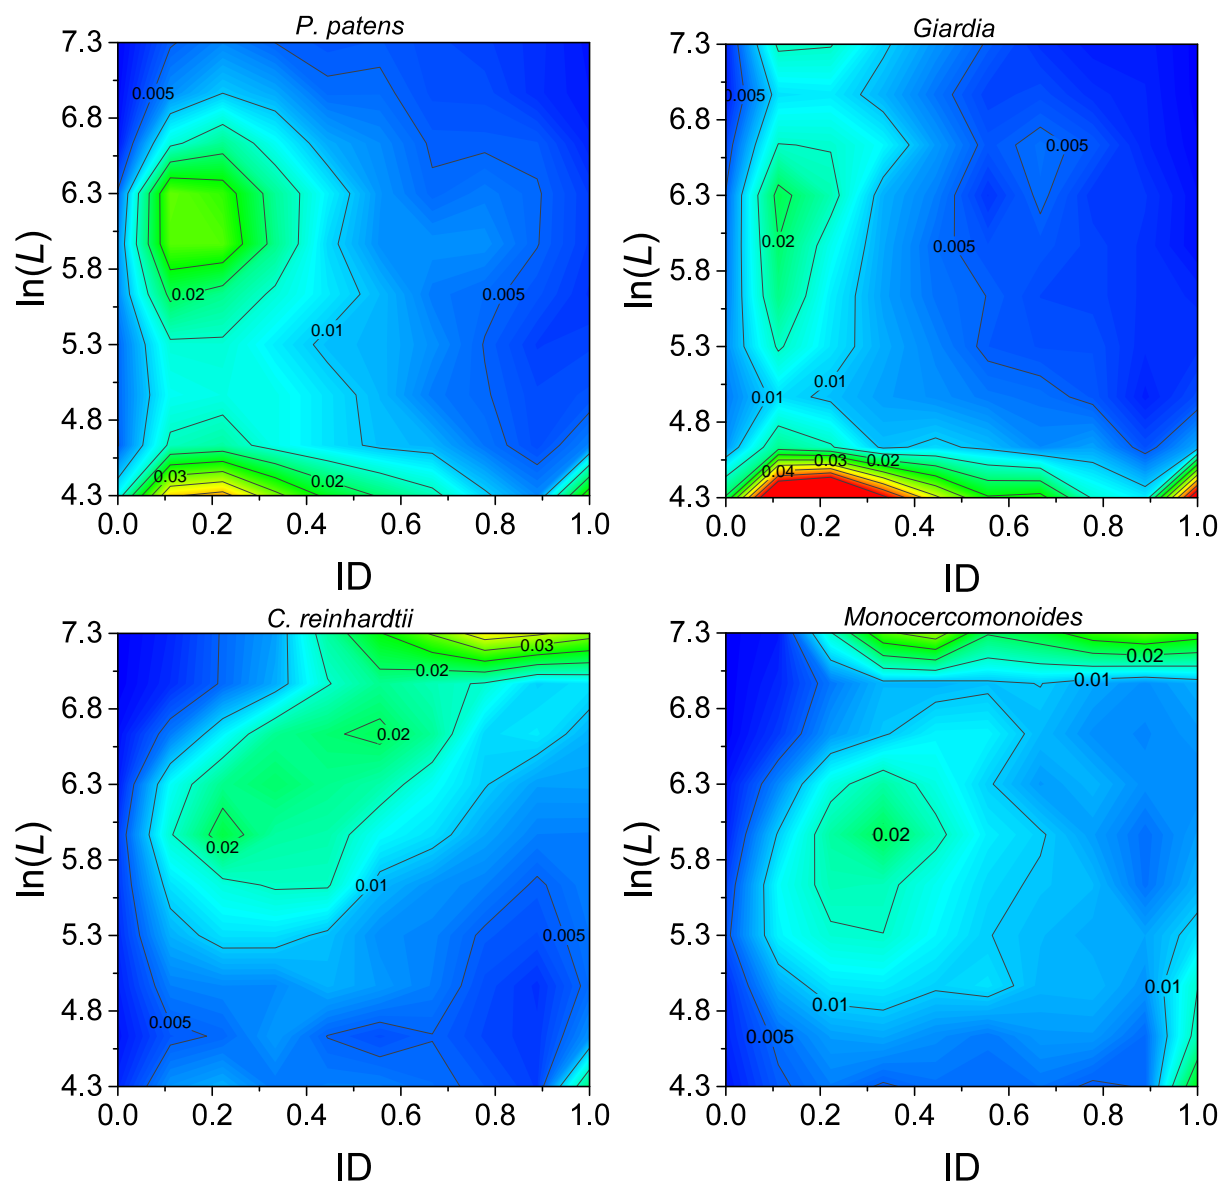

**Figure S1** (continued). Protein-density contour maps, continued (See Figure 3 in main text for the scale bar).

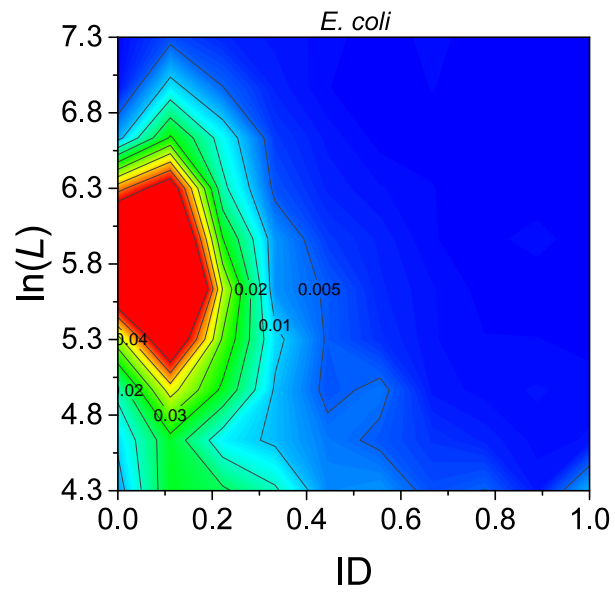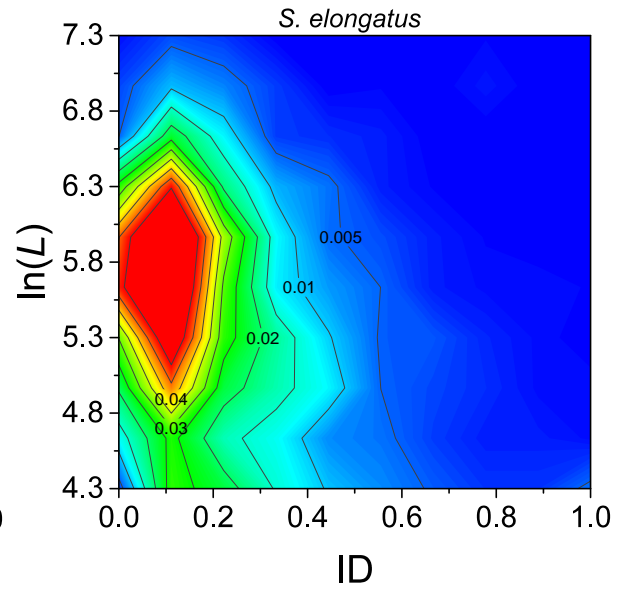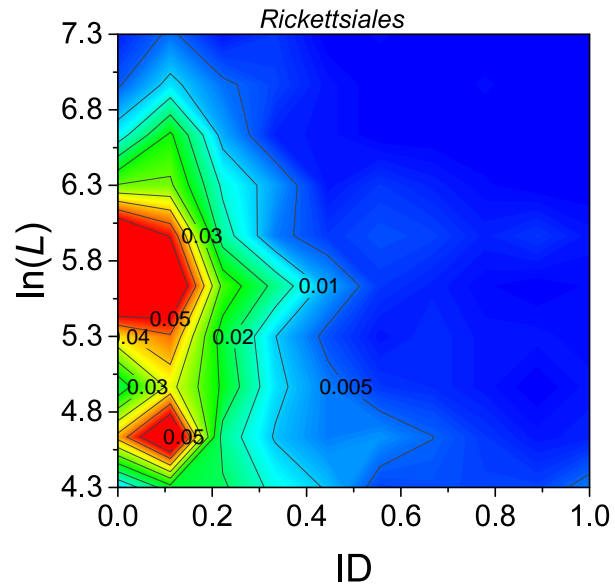

**Figure S1** (continued). Protein-density contour maps, continued (See Figure 3 in main text for the scale bar).



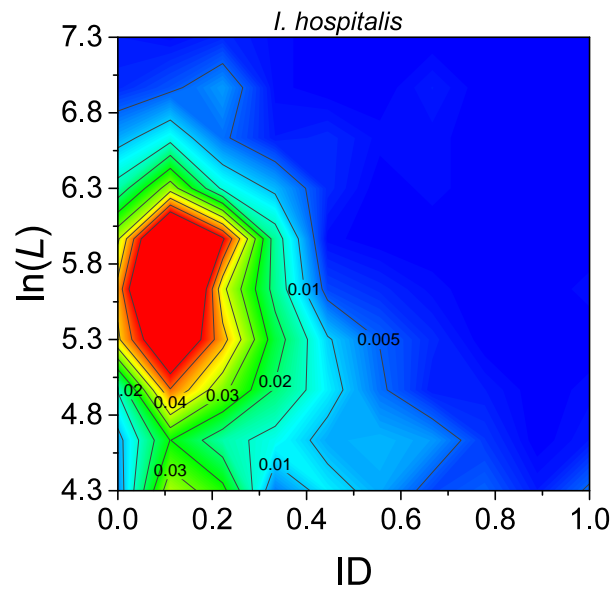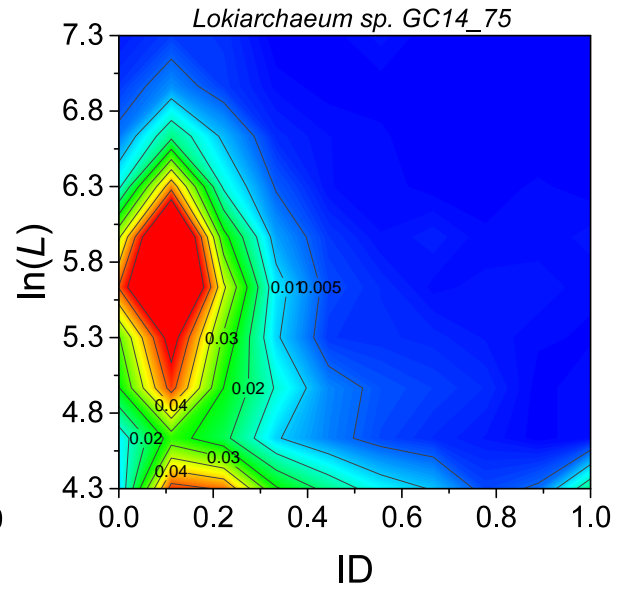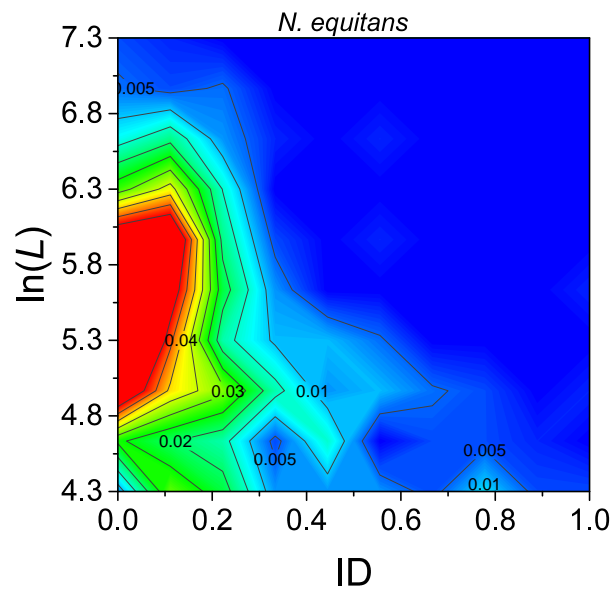

**Figure S1** (continued). Protein-density contour maps, continued (See Figure 3 in main text for the scale bar).

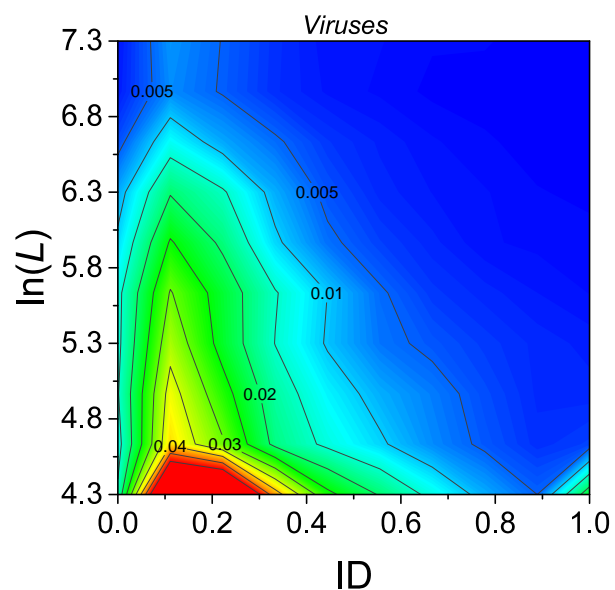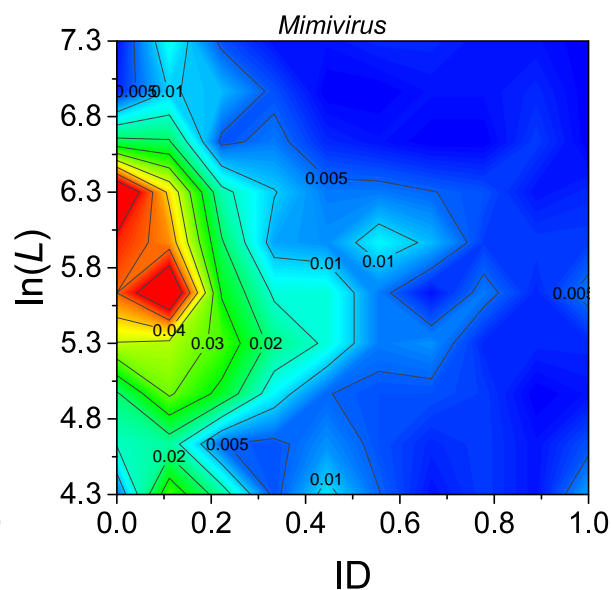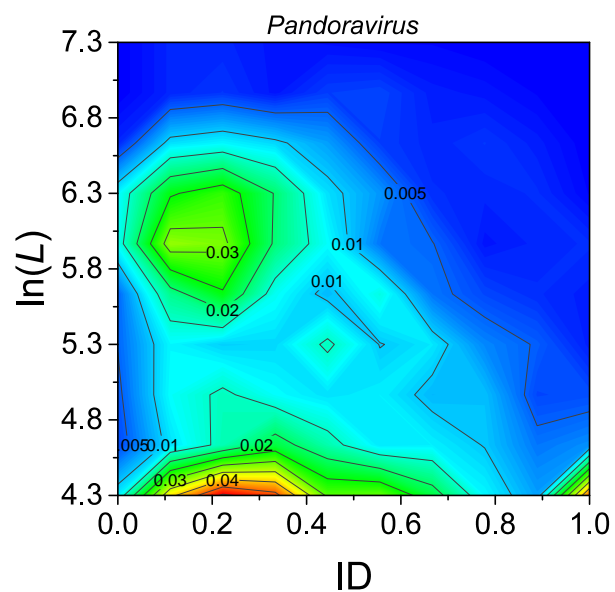

**Figure S1** (continued). Protein-density contour maps, continued (See Figure 3 in main text for the scale bar).

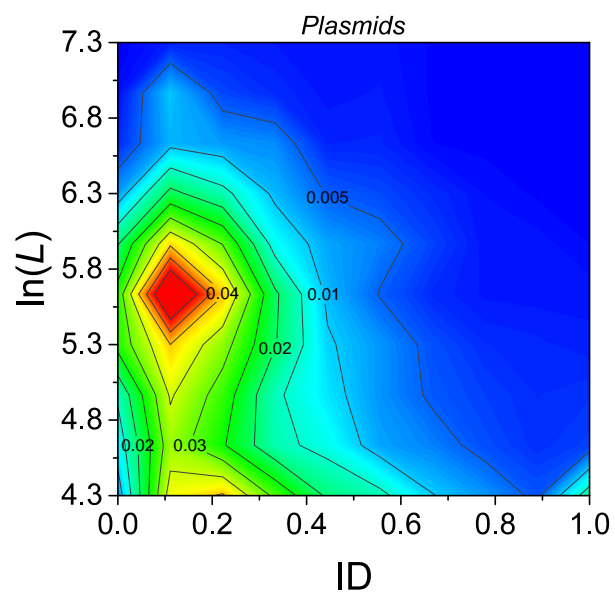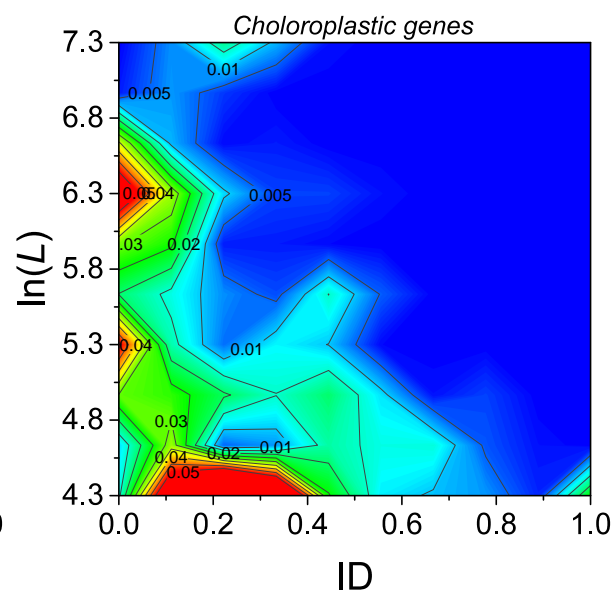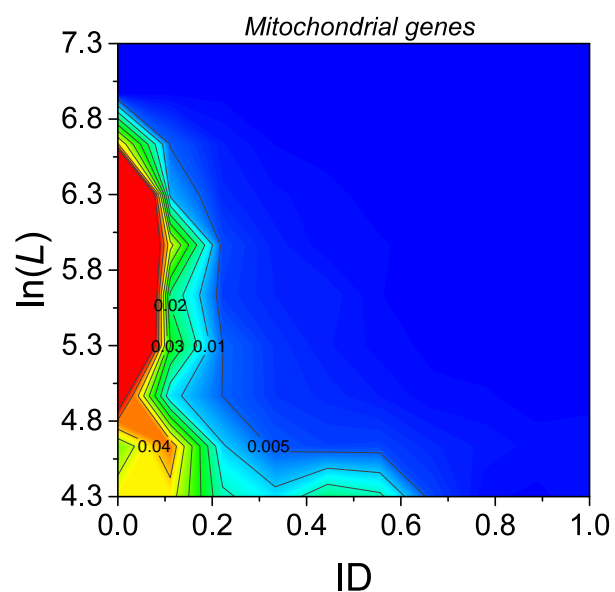

**Figure S1** (continued). Protein-density contour maps, continued (See Figure 3 in main text for the scale bar).

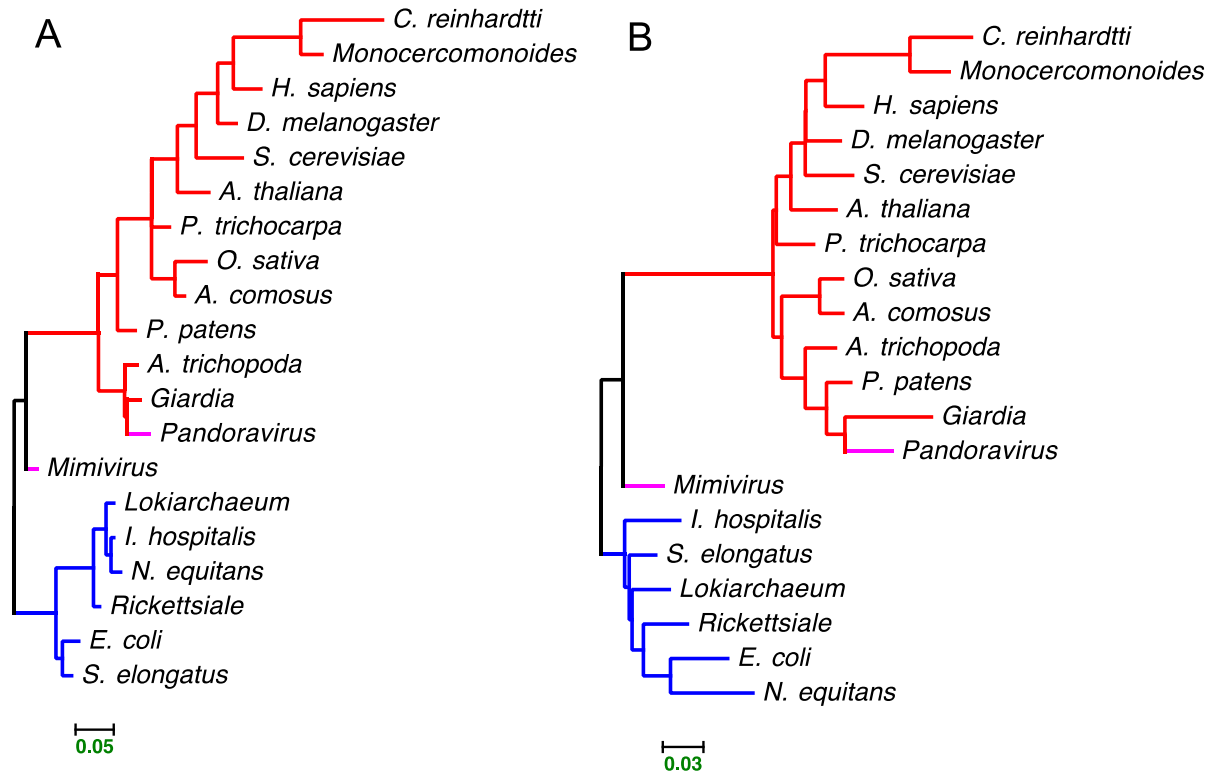

**Figure S2.** Phylogenetic trees reconstructed from the protein distributions in the *L-D* space using (A). M=N=2 and (B). M=N=5. Eukaryotes are in red, prokaryotes (bacteria and Archaea) in blue and giruses in pink branches, respectively. MEGA5 (1) was used to plot the trees. Compared to the M=N=10 (Fig. 4), the branch length of the tree is larger than the M=N=10 tree.

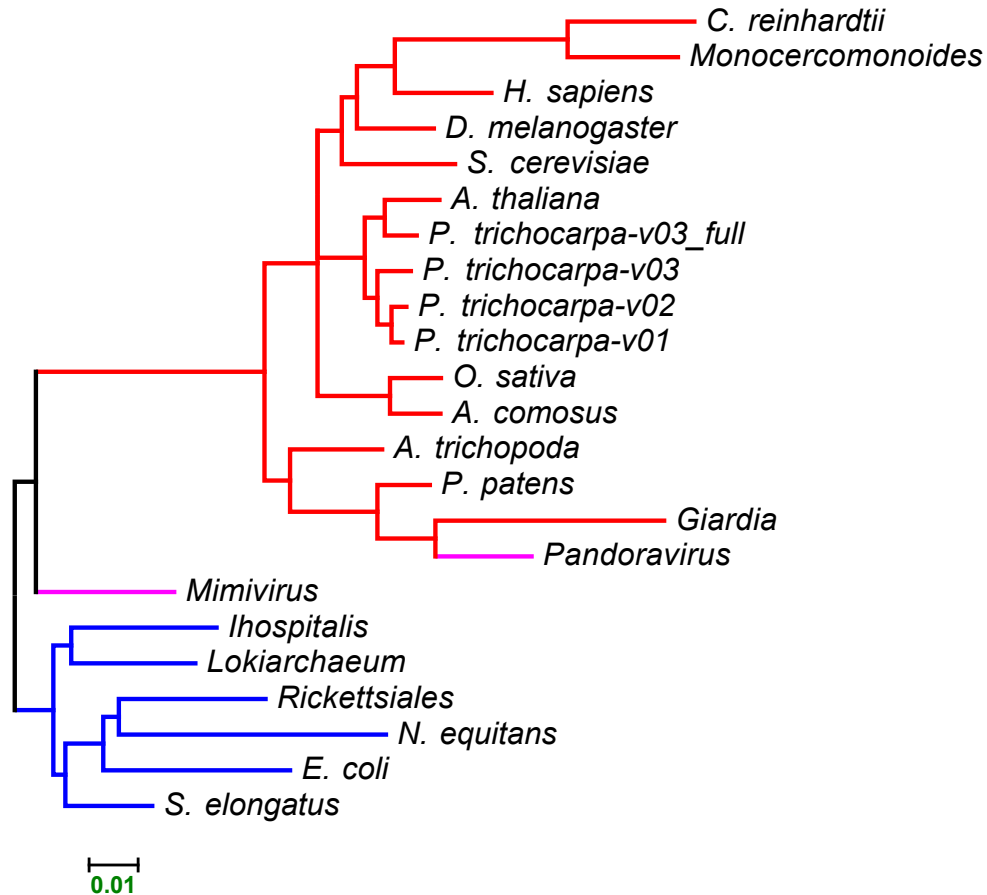

**Figure S3.** Phylogenetic tree reconstructed from gene densities on the *LD* space. Different versions (v01-v03) of the *P. trichocarpa* proteomes have been used. By default of the present work only proteins from primary transcripts are chosen for all proteomes. Here for *P. trichocarpa* proteome v03, we tested both the primary transcripts (41,434 proteins) and all transcripts (73,013 proteins). We show here that progressive improvements and including of the splicing variants did not make significant changes in the phylogeny.

#### References

1. K. Tamura *et al.*, MEGA5: Molecular Evolutionary Genetics Analysis Using Maximum Likelihood, Evolutionary Distance, and Maximum Parsimony Methods. *Mol Biol Evol* **28**, 2731 (Oct, 2011).
